# Supplementary material for: A quasi-2D perovskite antireflection coating to boost the performance of multilayered PdTe2/Ge heterostructure-based near-infrared photodetectors
Source: Royal Society of Chemistry journal article supplement (doi:10.1039/d2tc00438k), 2022-01-01
Supplement: d2tc00438k1.pdf [file d2tc00438k1.pdf]

Supplementary Information:

## Quasi-2D Perovskite Antireflection Coating to Boost Performance of Multilayered PdTe<sub>2</sub>/Ge Heterostructure-Based Near-Infrared Photodetectors

Huahan Chen,<sup>1</sup> Chao Xie,<sup>2\*</sup> Xianpeng Zhong,<sup>1</sup> Yi Liang,<sup>1</sup> Wenhua Yang,<sup>2</sup> Chunyan Wu,<sup>1</sup> and Linbao Luo<sup>1\*</sup>

<sup>1</sup> School of Microelectronics, Hefei University of Technology, Hefei, Anhui 230009, P. R. China

<sup>2</sup> School of Electronics and Information Engineering, Information Materials and Intelligent Sensing Laboratory of Anhui Province, Industry-Education-Research Institute of Advanced Materials and Technology for Integrated Circuits, Anhui University, Hefei, Anhui 230601, P. R. China

\* Email: chaoxie@ahu.edu.cn, luolb@hfut.edu.cn

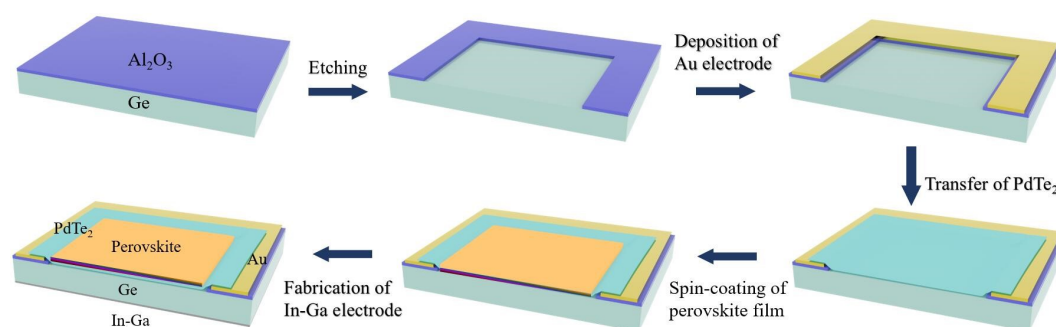

**Figure S1.** Schematic diagram of the procedures for fabricating PdTe<sub>2</sub>/Ge heterostructure-based photodetector with quasi-2D perovskite ARC.

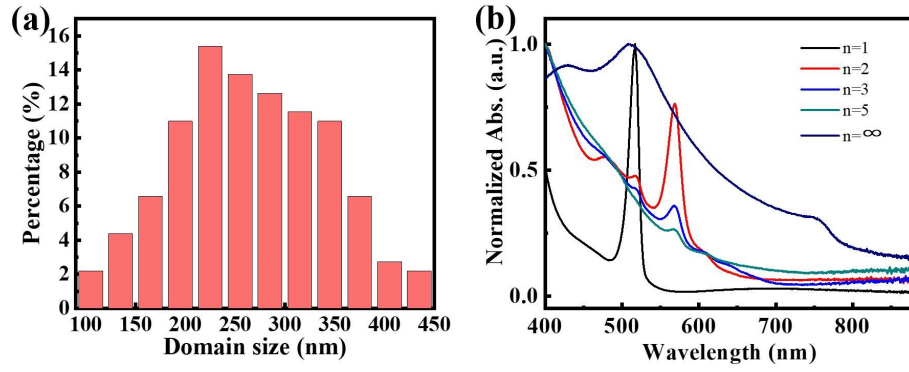

**Figure S2.** (a) The statistical distribution of the grain size of the PdTe<sub>2</sub> multilayer. (b) Normalized absorbance spectra of (PEA)<sub>2</sub>(MA) <sub>$n-1$</sub> Pb <sub>$n$</sub> I <sub>$3n+1$</sub>  perovskites with different  $n$  values.

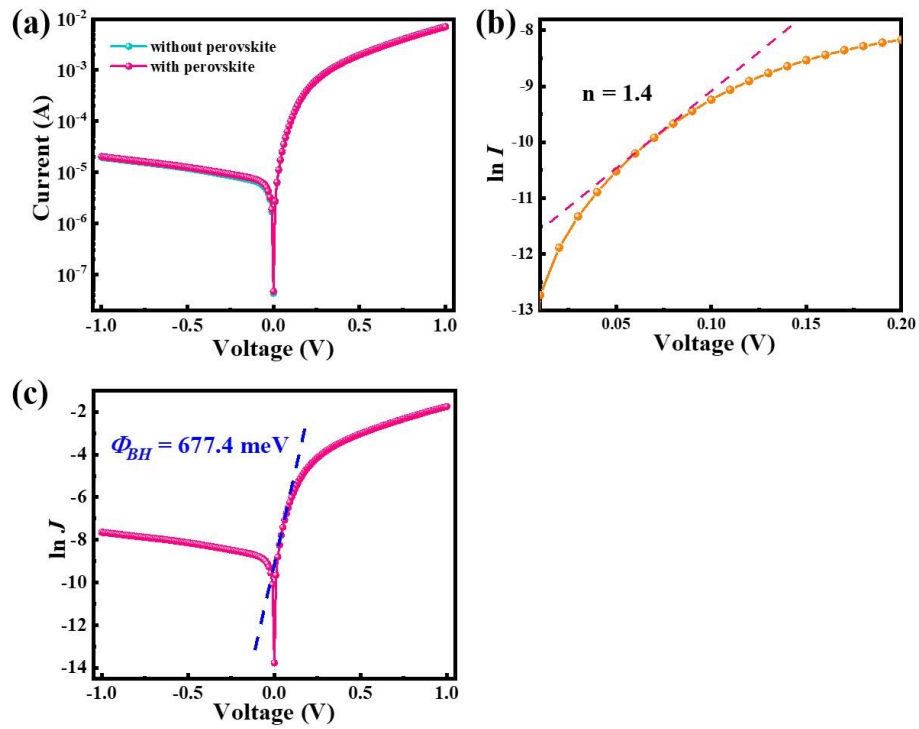

**Figure S3.** (a)  $I$ - $V$  curves of the PdTe<sub>2</sub>/Ge heterostructures without and with quasi-2D perovskite ARC in the darkness. (b)  $\ln I$ - $V$  curve for estimating the diode ideality factor ( $n$ ). (c) The plot of  $\ln J$ - $V$  curve for calculating the barrier height of the heterostructure.

The diode characteristics of the PdTe<sub>2</sub>/Ge heterostructure could be described by majority carriers over a zero bias barrier height ( $\Phi_{BH}$ ), from the PdTe<sub>2</sub> to Ge, based on the thermionic emission theory:<sup>1</sup>

$$J(T,V) = J_S(T) \left[ \exp\left(\frac{eV}{nK_B T}\right) - 1 \right]$$

where  $e$ ,  $K_B$  and  $T$  represent elementary charge, Boltzmann constant, and temperature, respectively.

The saturation current density  $J_S(T)$  is expressed as:

$$J_S(T) = A^* T^2 \exp\left(-\frac{e\Phi_{BH}}{K_B T}\right)$$

where  $A^*$  denotes the effective Richardson constant, and the value is  $142.8 \text{ Acm}^{-2}\text{K}^{-2}$  for n-Ge.<sup>2</sup> In

addition,  $J_S(T) = 6.23 \times 10^{-2} \text{ mAcm}^{-2}$  could be deduced from the  $\ln J-V$  curve in Fig. S3(c). Therefore,

the  $\Phi_{BH}$  was estimated to be  $\sim 677.4 \text{ meV}$  based on the above equations.

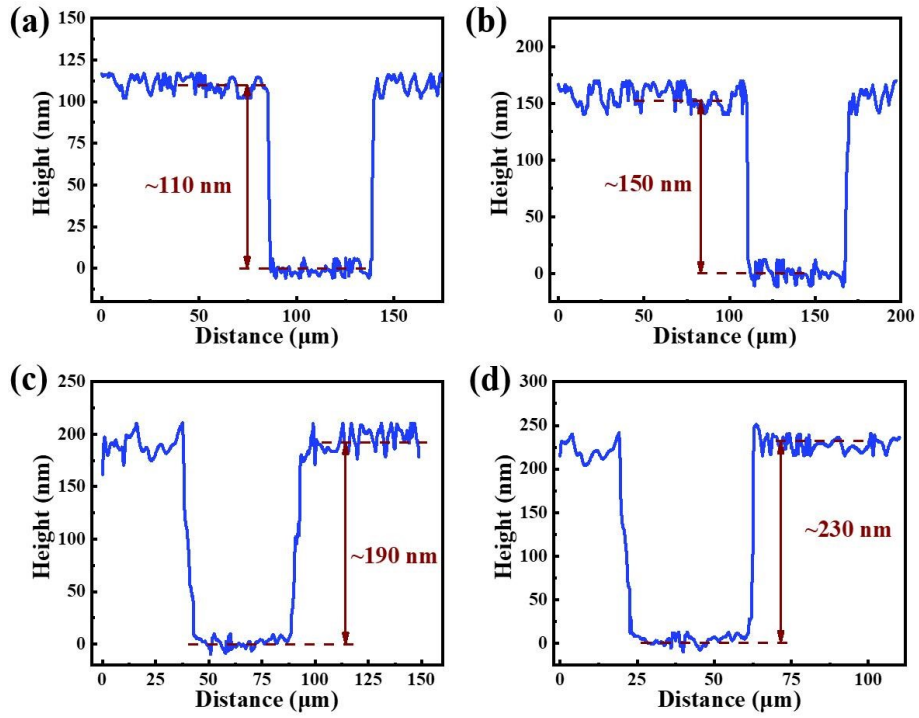

**Figure S4.** Height profile of the quasi-2D perovskite films with different thicknesses.

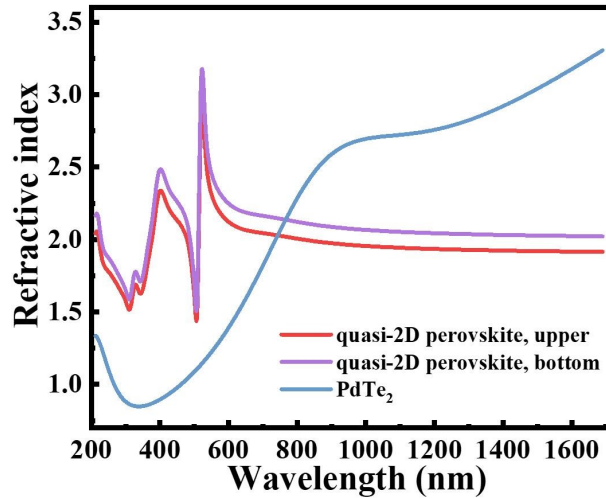

**Figure S5.** Refractive index of the quasi-2D perovskite film with a thickness of  $\sim 192.8$  nm and PdTe<sub>2</sub> multilayer with a thickness of  $\sim 56.7$  nm.

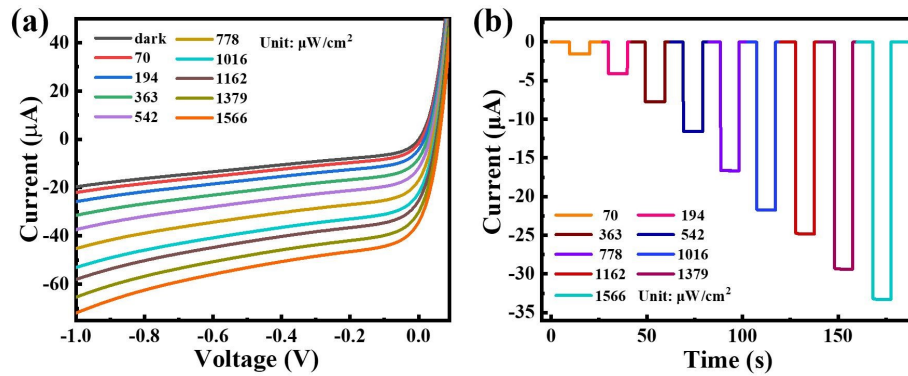

**Figure S6.** (a)  $I$ - $V$  curves and (b) time-dependent photoresponse of the PdTe<sub>2</sub>/Ge heterostructure-based photodetector under 1550 nm NIR light illumination with different intensities.

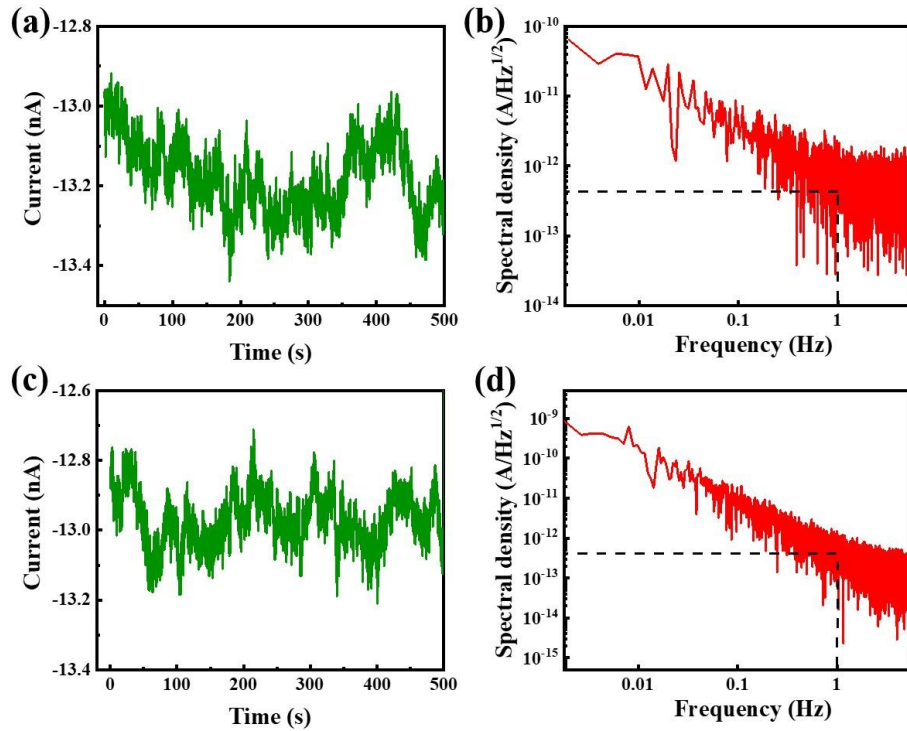

**Figure S7.** (a) The noise of the dark current and (b) analysis of noise spectral density of the PdTe<sub>2</sub>/Ge heterostructure-based photodetector at zero bias. (c) The noise of the dark current and (d) analysis of noise spectral density of the PdTe<sub>2</sub>/Ge heterostructure-based photodetector with quasi-2D perovskite ARC at zero bias.

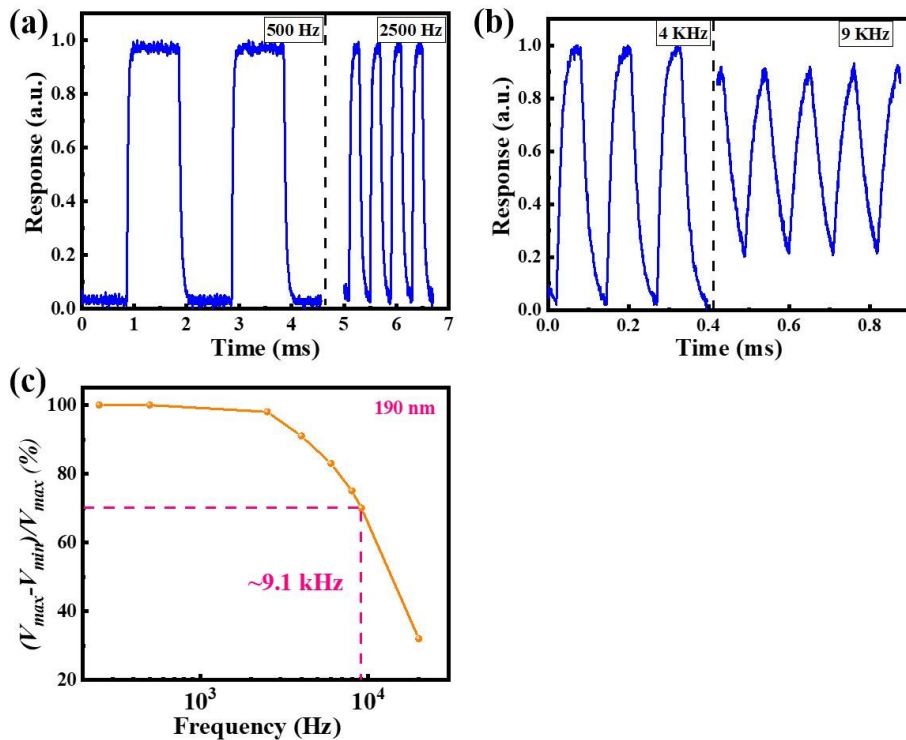

**Figure S8.** (a) and (b) are temporal photoresponse of the device under 1550 nm light illumination

with varied modulating frequencies. (c) Relative balance  $(V_{\max}-V_{\min})/V_{\max}$  versus frequency of the incident light, giving a -3 dB cutoff frequency of about 9.1 kHz.

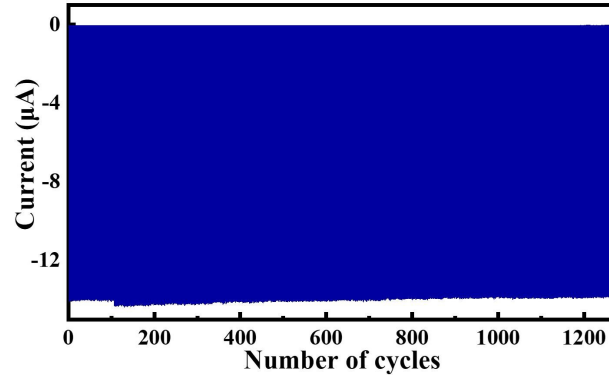

**Figure S9.** Temporal photoresponse of the device under 1550 nm light illumination during operation over 1200 cycles.

#### References

- 1 E. Shi, H. Li, L. Yang, L. Zhang, Z. Li, P. Li, Y. Shang, S. Wu, X. Li, J. Wei, K. Wang, H. Zhu, D. Wu, Y. Fang and A. Cao, *Nano Lett.*, 2013, **13**, 1776–1781.
- 2 S. M. Sze and K. K. Ng, *Physics of Semiconductor Devices*, 2007.
